# Supplementary material for: Facile synthesis of high-surface-area nanoporous carbon from biomass resources and its application in supercapacitors
Source: Royal Society of Chemistry journal article supplement (doi:10.1039/c7ra12525a), 2018-01-01
Supplement: c7ra12525a1.pdf [file c7ra12525a1.pdf]

**Facile synthesis of high-surface-area nanoporous carbon from biomass resource  
and their application in supercapacitors**

**Yuechao Yao<sup>a</sup>, Qi Zhang<sup>c</sup>, Peng Liu<sup>a</sup>, Liang Yu<sup>a</sup>, Lin Huang<sup>a,b</sup>, Shaozhong  
Zeng<sup>a,b</sup>, Lijia Liu<sup>a,b</sup>, Xierong Zeng<sup>a</sup>, Jizhao Zou<sup>\*,a</sup>**

**Fig. S1** The introduction of Root Of Multibract Raspberry.

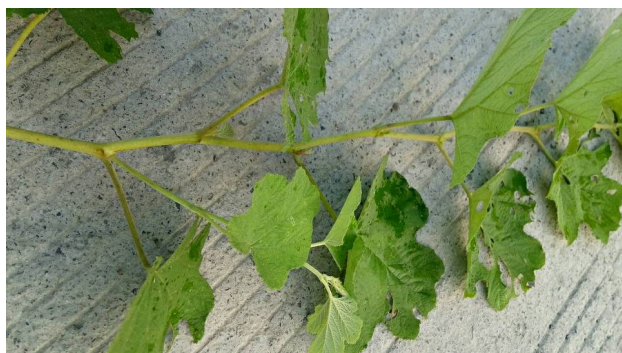

Title: Root Of Multibract Raspberry

Latin plant animal Mineral name: Rubus Multibracteatus Lévl.Et Vant.

The original form of Root Of Multibract Raspberry shrubs, 2-3m high. Flowering from April to June, fruit period from August to September.

Habitat distribution of the ecological environment: born at an altitude of 700-2500 m hillside and valley shade shrub or forest edge and roadside.

Distribution of resources: distributed in China's Guangdong, Guangxi, Yunnan, Guizhou province.

Link information: <http://www.xjishu.com/yiyao/zy/28344.html>.

**Table S1** the various element content of Root Of Multibract Raspberry.

| Element | Ray-type | Apparent concentration | k ratio | wt%   | wt% Sigma | Standard sample label |
|---------|----------|------------------------|---------|-------|-----------|-----------------------|
| C       | K        | 20.55                  | 0.20549 | 58.23 | 0.18      | C Vit                 |
| O       | K        | 14.77                  | 0.04969 | 39.86 | 0.18      | SiO2                  |
| Al      | K        | 0.08                   | 0.00061 | 0.16  | 0.02      | Al2O3                 |
| Cl      | K        | 0.21                   | 0.00181 | 0.39  | 0.02      | NaCl                  |

|        |   |      |         |        |      |              |
|--------|---|------|---------|--------|------|--------------|
| K      | K | 0.48 | 0.00410 | 0.87   | 0.03 | KBr          |
| Ca     | K | 0.26 | 0.00235 | 0.49   | 0.03 | Wollastonite |
| Total: |   |      |         | 100.00 |      |              |

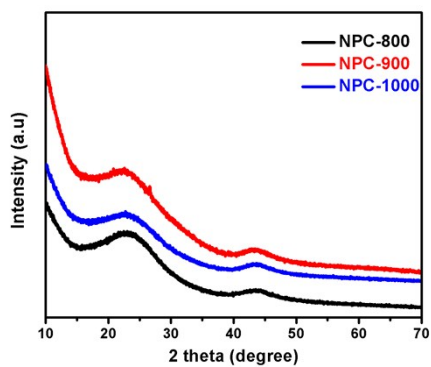

**Fig. S2.** The XRD patterns of NPC for different calcination temperatures.

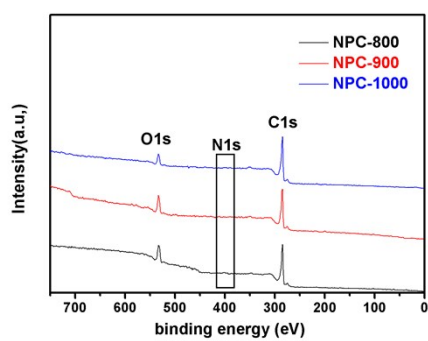

**Fig. S3.** The XPS spectrum of NPC-800,900 and 1000.

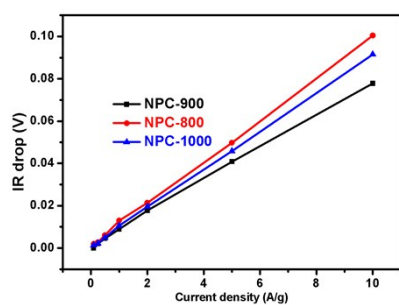

**Fig. S4.** The IR drops curves of NPC800, 900 and 1000.

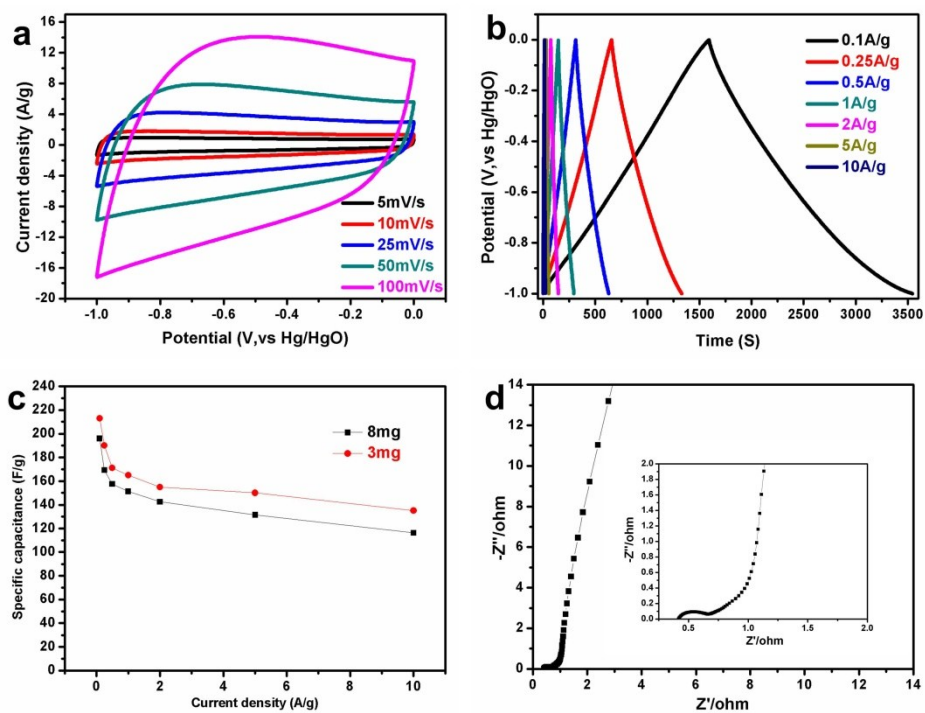

**Fig. S5** (a) CV curves of NPC-900 ( $8 \text{ mg cm}^{-2}$ ) at different scan rates. (b) GCD curves of NPC-900 ( $8 \text{ mg cm}^{-2}$ ) at the different current densities. (c) The specific capacity of NPC-900 ( $8,3 \text{ mg cm}^{-2}$ ) and at various current densities. (d) Nyquist plots of NPC-900 ( $8 \text{ mg cm}^{-2}$ ).
